# Supplementary material
Source: PubMed Central journal article supplement (PMC3497527)
Supplement: JB.01013-12_zjb999092179so1.pdf [file JB.01013-12_zjb999092179so1.pdf]

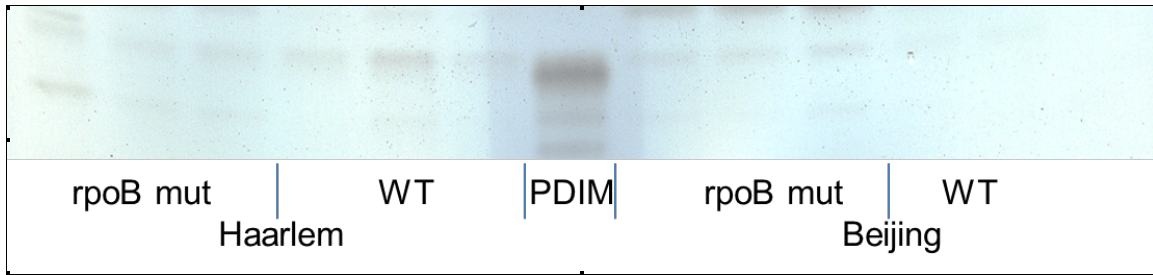

**Supplementary Figure 1.** Thin Layer Chromatography of lipid extracts obtained from *M. tuberculosis* clinical isolates in triplicate from independent cultures. *rpoB* mutants and WT isolates for each genotype are shown. A PDIM standard is also shown.
